# Supplementary material
Source: Springer Nature journal article supplement (https://www.springermedizin.de/resource/supplementary/12889_2013_6080_MOESM1_ESM.pdf/9494320)

Prevalence of insomnia

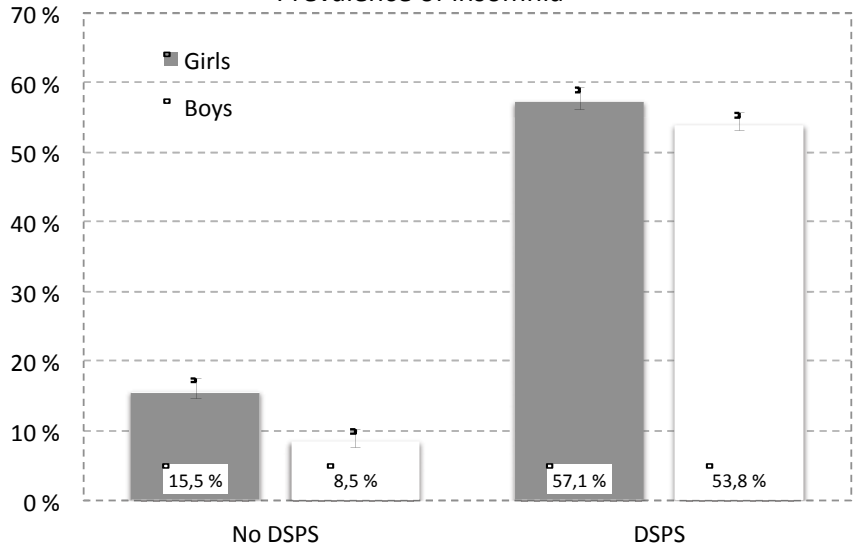

Prevalence of DPSP

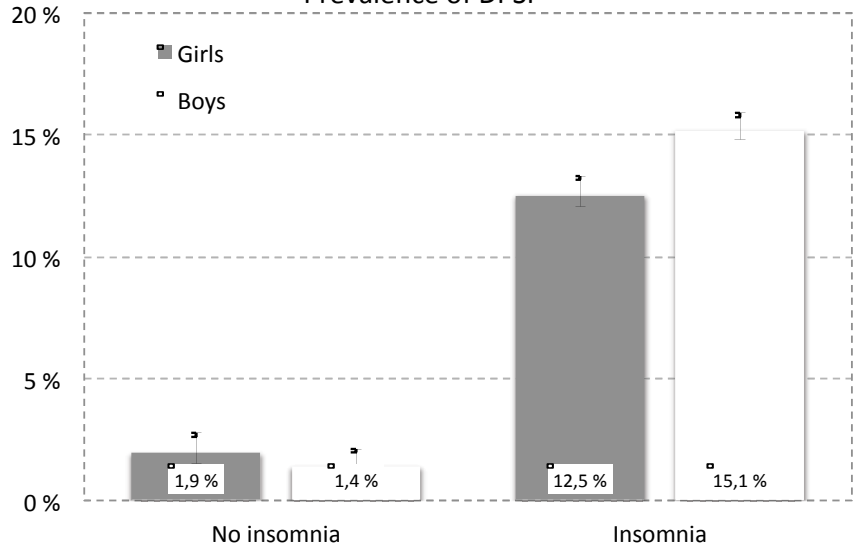

Supplement: MOESM1 [file 9494320]
